# Supplementary material
Source: PubMed Central journal article supplement (PMC150217)
Supplement: nar_31_4_1261__1.pdf [file nar_31_4_1261__1.pdf]

## SUPPLEMENTARY MATERIAL

Table S1. Oligonucleotides used in this study (Kobayashi *et al.*)

| Number | Sequence                                                           |
|--------|--------------------------------------------------------------------|
| TK245  | 5'-GGTTTTCCGTA CTCTCATCAC-3'                                       |
| TK246  | 5'-ATGGATTGATTCCGGATTCAA-3'                                        |
| TK678  | 5'-AAGTGATTATCTGAATAATGAAAG-3'                                     |
| TK679  | 5'-GAATGATTTGCAGCGGTGGTAAAA-3'                                     |
| TK680  | 5'-GCATTCGAATCATAACCGAA-3'                                         |
| TK681  | 5'-CAGACAAGAAACAACAGTAAC-3'                                        |
| TK682  | 5'-AGTGCAGCAACAAAGGGTAC-3'                                         |
| TK683  | 5'-CAATAACTGGAGGTTCTGCT-3'                                         |
| TK684  | 5'-GTATGACGGACTTGGAATT-3'                                          |
| TK685  | 5'-TATTTAGTAGAATTAGAAC-3'                                          |
| TK687  | 5'-TGTGA ACTATAACTTTAGGA-3'                                        |
| TK741  | 5'-CCTCATCAATTCCGACAG-3'                                           |
| TK765  | 5'-CTTCACTAACTCTCTTGATTTACGCTTTGACAT-3'                            |
| TK772  | 5'-CACGGATCCTTATTTTTTTGTATTCAAGCT-3'                               |
| TK1043 | 5'-ATGAGTTCCGTCAATAAA-3'                                           |
| TK1044 | 5'-GCAACAGTGGTTTGCAGA-3'                                           |
| TK1088 | 5'-CACACAGAATTCATGTCTTCCAATCCAGAA-3'                               |
| TK1096 | 5'-AGGAATCCTAATATTTTAATTTCTCTCCAAATG-3'                            |
| TK1337 | 5'-CATAACCGAATCTTTGCCAGTGTGTGTATAAAAATACGACACGGATCCCCGGGTAAATTA-3' |
| TK1338 | 5'-AATTTTTTCTGTGGAAGAGTGGAGAATGTGGGTAACATAAGAATTCGAGCTCGTTAAAC-3'  |
| TK1499 | 5'-CGTC AAGACTGTCAAGGAGGG-3'                                       |
| TK1879 | 5'-ATGAACAACACTTCCATA-3'                                           |
| TK1880 | 5'-ATATGCTCTTCTGAGCTC-3'                                           |
| TK1881 | 5'-ATGGTTTTGCCGATTCTA-3'                                           |
| TK1882 | 5'-ACGCTCCTTTGGTACATT-3'                                           |
| TK1889 | 5'-ATGAAGATAAAAATTGAC-3'                                           |
| TK1890 | 5'-ACCCTCACTGTTTATTGC-3'                                           |
| TK1895 | 5'-ATGAGGAAGCTAAATCCA-3'                                           |
| TK1896 | 5'-TATGATTTCTTGATAGT-3'                                            |
| TK1915 | 5'-CCGGCATCTACTATTGAG-3'                                           |
| TK1955 | 5'-CACACAGGATCCTTAATTTCTCTCCAAATGTAA-3'                            |
| TK1976 | 5'-CACACAGAATTCATGAATGCCAGTGCTTTG-3'                               |
| TK1978 | 5'-CACACACTGCAGACAAGTAATGCA-3'                                     |
| TK1979 | 5'-CACACAGGATCCTGTCTGATTTTATACACA-3'                               |
| TK1980 | 5'-CACACAGGATCCATGAATGCCAGTGCTTTG-3'                               |
| TK1981 | 5'-CACACAGCGGCCGCTCTAGAACTA-3'                                     |
| TK2063 | 5'-ACACACGAATTCCTATTTTTTTGTATTCAA-3'                               |
| TK2064 | 5'-CACACAGGATCCATGAATGCCAGTGCTTTG-3'                               |

TK2065 5'-ACACACGAATTCTTAATTTCTCTCCAAATGTAA-3'  
TK2111 5'-ATGAGCTTACCCGATGGA-3'  
TK2112 5'-AATGTCCTCGATGTGGCC-3'  
TK2113 5'-ATGTCAGGAAAAGCTCAT-3'  
TK2114 5'-ATCGTCACCTCTAATGGC-3'  
TK2115 5'-ATGTCTCAAGTACTTTA-3'  
TK2116 5'-TTGCCATCTGATGATTTG-3'  
TK2117 5'-ATGTCTGTGCCCAAAAAA-3'  
TK2118 5'-AACGTCAAAGAAATAAGA-3'  
TK2119 5'-ATGCTATTTGGTATTA-3'  
TK2121 5'-ATGTTTAAATCTGTTGTT-3'  
TK2125 5'-ATGTCATTTACCAACAG-3'  
TK2126 5'-TGGGGAATCTGACATCTT-3'  
TK2294 5'-ATGGTACTCAATTCAAA-3'  
TK2295 5'-TTAAGCATTAGCAGCAAT-3'  
TK2296 5'-ATGGCGAAAAGCAAATCC-3'  
TK2297 5'-TTCTTCGTCGTCGTCGTC-3'  
TK2298 5'-ATGCTAGCCGAAAAAACC-3'  
TK2299 5'-CTCACCAACGATTGGATA -3'  
TK2431 5'-CCAATCTTTGAGCCTCAT-3'  
TK2432 5'-CGTAATCATCGTTCAAGA-3'  
TK2658 5'-GTCGGCAAGATCCAATGCTAATTCCTCAACATC-3'  
TK2659 5'-TTTTCTGTGTTTTGCCGCTCTACAAGAAAAAGC-3'  
TK2708 5'-ACACACCATATGGCAAATTCGCCGAAA-3'  
TK2709 5'-CACACAGGATCCTTAATCTCTGATCTTGGCATA-3'  
TK2900 5'-CACACAGGATCCGTTATGTCAAAGCGTAAA -3'  
TK2901 5'-ACACACGAATTCTTAATCCTAATATTCCAATT -3'

---
